# Supplementary material for: Sperm physiology and in vitro fertility outcomes rely on their basal metabolic activity
Source: Research Square preprint supplement (doi:10.21203/rs.3.rs-2390938/v1), 2022-12-27

**Supplementary Table 1.** Variable description.

| Feature | Block | Mean ± SD |
| --- | --- | --- |
| Early blastocyst/blastocyst | IVF Outcomes | 13.570 ± 7.920 |
| Total embryos | IVF Outcomes | 45.186 ± 12.128 |
| Hatching/Hatched blastocyst | IVF Outcomes | 0.963 ± 1.772 |
| Morulae | IVF Outcomes | 12.798 ± 6.704 |
| Morulae and total blastocyst | IVF Outcomes | 27.329 ± 11.16 |
| Developmental competency fertilised oocyte | IVF Outcomes | 1.408 ± 0.47 |
| Developmental ratio | IVF Outcomes | 2.354 ± 2.474 |
| Fertilisation Rate | IVF Outcomes | 37.030 ± 11.802 |
| Intracellular calcium levels | Sperm Function | 2.859 ± 2.372 |
| Sperm with high mitochondrial potential | Sperm Function | 1.183 ± 0.833 |
| Viable sperm with intact acrosome | Sperm Function | 0.994 ± 0.030 |
| Viable sperm | Sperm Quality | 90.289 ± 3.598 |
| Progressive Motility | Sperm Quality | 72.249 ± 10.362 |
| Total Motility | Sperm Quality | 88.467 ± 5.386 |
| Sperm with normal morphology | Sperm Quality | 92.880 ± 7.856 |

Abbreviations: IVF, in vitro fertilisation.

**Supplementary Table 2.** Correlation between block components from the multi-block data integration*.

|  | Component 1  Sperm Quality | Component 2  Sperm Quality | Component 1  Sperm Function | Component 2  Sperm Function | Component 1  IVF Outcomes | Component 2  IVF Outcomes |
| --- | --- | --- | --- | --- | --- | --- |
| Component 1  metabolomics | 0.45 | 0.06 | 0.65 | 0.05 | 0.78 | 0.00 |
| Component 2  metabolomics | -0.59 | 0.55 | 0.25 | 0.37 | -0.13 | 0.50 |
| Component 1  Sperm Quality | - | - | 0.00 | -0.29 | 0.46 | -0.16 |
| Component 2  Sperm Quality | - | - | 0.18 | 0.38 | 0.21 | 0.63 |
| Component 1  Sperm Function | - | - | - | - | 0.55 | 0.21 |
| Component 2  Sperm Function | - | - | - | - | 0.03 | 0.45 |

*Correlated latent components from the projection to latent structures method utilized the *in vitro* fertilisation (IVF) outcomes as reference dataset.

**Supplementary Table 3.** Unfolded pair-wise similarity scores from multi-block data integration.

| Feature block X | Feature block Y | Similarity Score |
| --- | --- | --- |
| Citrate | Intracellular calcium levels | -0.89 |
| Intracellular calcium levels | Morulae and total blastocyst | -0.88 |
| Progressive Motility | Intracellular calcium levels | -0.87 |
| Total Motility | Intracellular calcium levels | -0.87 |
| α-Ketoglutarate/citrate | Total embryos | -0.86 |
| Intracellular calcium levels | Total embryos | -0.85 |
| Sperm with normal morphology | Intracellular calcium levels | -0.84 |
| α-Hydroxyglutarate/Isocitrate | Total embryos | -0.84 |
| Citrate/Malate | Intracellular calcium levels | -0.83 |
| Citrate/Lactate | Intracellular calcium levels | -0.81 |
| Lactate | Viable sperm | -0.77 |
| α-Ketoglutarate/citrate | Morulae | -0.76 |
| Intracellular calcium levels | Morulae | -0.74 |
| α-Hydroxyglutarate/Isocitrate | Morulae | -0.74 |
| α-Ketoglutarate/citrate | Total Motility | -0.74 |
| α-Hydroxyglutarate/Isocitrate | Total Motility | -0.74 |
| α-Ketoglutarate/citrate | Developmental competency fertilised oocyte | -0.73 |
| Lactate | Developmental ratio | -0.72 |
| α-Hydroxyglutarate/Isocitrate | Developmental competency fertilised oocyte | -0.71 |
| α-Hydroxyglutarate/Isocitrate | Progressive Motility | -0.70 |
| α-Ketoglutarate/citrate | Progressive Motility | -0.69 |
| Intracellular calcium levels | Developmental competency fertilised oocyte | -0.69 |
| Intracellular calcium levels | Hatching/Hatched blastocyst | -0.68 |
| Isocitrate | Intracellular calcium levels | -0.68 |
| α-Hydroxyglutarate/Isocitrate | Sperm with normal morphology | -0.66 |
| α-Hydroxyglutarate/Isocitrate | Morulae and total blastocyst | -0.66 |
| α-Ketoglutarate/citrate | Sperm with normal morphology | -0.65 |
| α-Ketoglutarate/citrate | Morulae and total blastocyst | -0.65 |
| Viable sperm with intact acrosome | Morulae and total blastocyst | -0.62 |
| Sperm with high mitochondrial potential | Developmental ratio | -0.61 |
| Citrate/Lactate | Viable sperm with intact acrosome | -0.60 |
| Lactate | Early blastocyst/blastocyst | -0.59 |
| Acetoacetate | Developmental ratio | -0.58 |
| Viable sperm | Intracellular calcium levels | -0.58 |
| Viable sperm | Viable sperm with intact acrosome | -0.58 |
| Progressive Motility | Viable sperm with intact acrosome | -0.57 |
| Sperm with normal morphology | Viable sperm with intact acrosome | -0.56 |
| α-Ketoglutarate/citrate | Sperm with high mitochondrial potential | -0.56 |
| Total Motility | Viable sperm with intact acrosome | -0.54 |
| Viable sperm | Sperm with high mitochondrial potential | -0.54 |
| Acetoacetate | Viable sperm | -0.54 |
| α-Ketoglutarate | Intracellular calcium levels | -0.53 |
| α-Hydroxyglutarate/Isocitrate | Sperm with high mitochondrial potential | -0.52 |
| Fumarate | Developmental ratio | -0.51 |
| Citrate/Malate | Viable sperm with intact acrosome | -0.50 |
| Viable sperm with intact acrosome | Hatching/Hatched blastocyst | -0.50 |
| α-Hydroxyglutarate/Isocitrate | Hatching/Hatched blastocyst | -0.48 |
| Citrate | Viable sperm with intact acrosome | -0.48 |
| Succinate | Intracellular calcium levels | -0.48 |
| Isocitrate/Citrate | Viable sperm | -0.47 |
| α-Ketoglutarate/citrate | Hatching/Hatched blastocyst | -0.47 |
| Intracellular calcium levels | Early blastocyst/blastocyst | -0.46 |
| Viable sperm with intact acrosome | Early blastocyst/blastocyst | -0.45 |
| Lactate | Morulae and total blastocyst | -0.45 |
| α-Hydroxyglutarate/α-Ketoglutarate | Total embryos | -0.44 |
| Isocitrate/Citrate | Developmental ratio | -0.44 |
| Viable sperm with intact acrosome | Developmental ratio | -0.44 |
| Fumarate | Viable sperm | -0.42 |
| Viable sperm with intact acrosome | Total embryos | -0.42 |
| α-Hydroxyglutarate/α-Ketoglutarate | Total Motility | -0.41 |
| Lactate | Hatching/Hatched blastocyst | -0.41 |
| Malate/Succinate | Sperm with high mitochondrial potential | -0.41 |
| Sperm with high mitochondrial potential | Early blastocyst/blastocyst | -0.41 |
| Acetoacetate | Early blastocyst/blastocyst | -0.40 |
| α-Hydroxyglutarate/α-Ketoglutarate | Progressive Motility | -0.40 |
| α-Hydroxyglutarate/α-Ketoglutarate | Morulae | -0.39 |
| α-Hydroxyglutarate/α-Ketoglutarate | Morulae and total blastocyst | -0.39 |
| Fumarate/Succinate | Viable sperm | -0.38 |
| α-Hydroxyglutarate/α-Ketoglutarate | Sperm with normal morphology | -0.38 |
| α-Hydroxyglutarate/α-Ketoglutarate | Developmental competency fertilised oocyte | -0.37 |
| Viable sperm with intact acrosome | Morulae | -0.36 |
| Isocitrate/Citrate | Early blastocyst/blastocyst | -0.36 |
| Intracellular calcium levels | Developmental ratio | -0.36 |
| Fumarate/Succinate | Morulae and total blastocyst | -0.36 |
| Lactate | Sperm with normal morphology | -0.35 |
| Lactate | Progressive Motility | -0.33 |
| Fumarate/Succinate | Progressive Motility | -0.32 |
| Fumarate/Succinate | Sperm with normal morphology | -0.32 |
| Fumarate | Early blastocyst/blastocyst | -0.32 |
| Viable sperm with intact acrosome | Developmental competency fertilised oocyte | -0.32 |
| Fumarate | Intracellular calcium levels | -0.31 |
| Fumarate/Succinate | Developmental ratio | -0.31 |
| Malate/Succinate | Total embryos | -0.30 |
| Malate | Developmental ratio | -0.30 |
| Succinate | Morulae and total blastocyst | 0.31 |
| Fumarate/Succinate | Intracellular calcium levels | 0.31 |
| Malate | Morulae | 0.33 |
| Total Motility | Developmental ratio | 0.34 |
| Malate | Developmental competency fertilised oocyte | 0.34 |
| Succinate | Sperm with normal morphology | 0.35 |
| Viable sperm | Fertilisation Rate | 0.35 |
| Citrate | Viable sperm | 0.35 |
| Malate | Total embryos | 0.36 |
| Isocitrate | Hatching/Hatched blastocyst | 0.37 |
| Lactate | Viable sperm with intact acrosome | 0.38 |
| α-Ketoglutarate/citrate | Viable sperm with intact acrosome | 0.38 |
| Succinate | Progressive Motility | 0.38 |
| Citrate/Malate | Early blastocyst/blastocyst | 0.39 |
| Isocitrate/Citrate | Sperm with high mitochondrial potential | 0.39 |
| α-Hydroxyglutarate/Isocitrate | Viable sperm with intact acrosome | 0.40 |
| Acetoacetate | Morulae | 0.41 |
| α-Ketoglutarate | Morulae and total blastocyst | 0.42 |
| Total Motility | Early blastocyst/blastocyst | 0.43 |
| Progressive Motility | Developmental ratio | 0.43 |
| α-Ketoglutarate | Sperm with normal morphology | 0.43 |
| α-Ketoglutarate | Sperm with high mitochondrial potential | 0.44 |
| α-Hydroxyglutarate/α-Ketoglutarate | Intracellular calcium levels | 0.44 |
| Acetoacetate | Developmental competency fertilised oocyte | 0.44 |
| Sperm with normal morphology | Developmental ratio | 0.44 |
| Succinate | Total Motility | 0.45 |
| Citrate/Lactate | Developmental competency fertilised oocyte | 0.45 |
| Acetoacetate | Total embryos | 0.46 |
| α-Ketoglutarate | Progressive Motility | 0.46 |
| Malate | Sperm with high mitochondrial potential | 0.48 |
| Citrate/Malate | Viable sperm | 0.49 |
| Citrate | Sperm with high mitochondrial potential | 0.50 |
| α-Ketoglutarate | Total Motility | 0.50 |
| Progressive Motility | Early blastocyst/blastocyst | 0.50 |
| Sperm with normal morphology | Early blastocyst/blastocyst | 0.50 |
| α-Ketoglutarate | Developmental competency fertilised oocyte | 0.52 |
| Citrate/Lactate | Morulae | 0.52 |
| Fumarate | Morulae | 0.52 |
| Isocitrate | Morulae and total blastocyst | 0.52 |
| Sperm with high mitochondrial potential | Morulae | 0.53 |
| α-Ketoglutarate | Morulae | 0.53 |
| Fumarate | Developmental competency fertilised oocyte | 0.54 |
| Isocitrate | Sperm with normal morphology | 0.55 |
| Sperm with high mitochondrial potential | Developmental competency fertilised oocyte | 0.55 |
| Sperm with normal morphology | Developmental competency fertilised oocyte | 0.56 |
| Succinate | Developmental competency fertilised oocyte | 0.57 |
| Succinate | Morulae | 0.57 |
| Citrate | Hatching/Hatched blastocyst | 0.58 |
| Fumarate | Total embryos | 0.58 |
| Sperm with high mitochondrial potential | Total embryos | 0.58 |
| Isocitrate | Progressive Motility | 0.58 |
| Citrate/Malate | Hatching/Hatched blastocyst | 0.60 |
| Citrate/Lactate | Total embryos | 0.60 |
| Isocitrate | Sperm with high mitochondrial potential | 0.60 |
| Progressive Motility | Developmental competency fertilised oocyte | 0.60 |
| α-Ketoglutarate | Total embryos | 0.60 |
| Citrate/Lactate | Developmental ratio | 0.61 |
| Citrate/Lactate | Early blastocyst/blastocyst | 0.62 |
| Sperm with normal morphology | Morulae | 0.62 |
| Lactate | Sperm with high mitochondrial potential | 0.62 |
| Citrate/Malate | Developmental competency fertilised oocyte | 0.63 |
| Succinate | Sperm with high mitochondrial potential | 0.63 |
| Isocitrate | Total Motility | 0.64 |
| Total Motility | Hatching/Hatched blastocyst | 0.64 |
| Succinate | Total embryos | 0.64 |
| Total Motility | Developmental competency fertilised oocyte | 0.65 |
| Viable sperm | Hatching/Hatched blastocyst | 0.65 |
| Sperm with normal morphology | Hatching/Hatched blastocyst | 0.66 |
| Progressive Motility | Morulae | 0.66 |
| Progressive Motility | Hatching/Hatched blastocyst | 0.67 |
| Citrate/Malate | Morulae | 0.68 |
| Isocitrate | Developmental competency fertilised oocyte | 0.68 |
| Citrate/Lactate | Hatching/Hatched blastocyst | 0.70 |
| Isocitrate | Morulae | 0.70 |
| Total Motility | Morulae | 0.70 |
| Sperm with normal morphology | Total embryos | 0.71 |
| Citrate/Malate | Sperm with normal morphology | 0.74 |
| Progressive Motility | Total embryos | 0.75 |
| Viable sperm | Morulae and total blastocyst | 0.76 |
| Citrate/Lactate | Total Motility | 0.76 |
| Viable sperm | Early blastocyst/blastocyst | 0.76 |
| Citrate | Sperm with normal morphology | 0.77 |
| Citrate | Developmental competency fertilised oocyte | 0.77 |
| Citrate/Malate | Total embryos | 0.77 |
| Citrate/Malate | Progressive Motility | 0.77 |
| Acetoacetate | Sperm with high mitochondrial potential | 0.77 |
| Citrate/Malate | Morulae and total blastocyst | 0.78 |
| Citrate/Malate | Total Motility | 0.78 |
| Citrate | Morulae and total blastocyst | 0.78 |
| α-Hydroxyglutarate/Isocitrate | Intracellular calcium levels | 0.78 |
| α-Ketoglutarate/citrate | Intracellular calcium levels | 0.78 |
| Citrate/Lactate | Sperm with normal morphology | 0.78 |
| Isocitrate | Total embryos | 0.79 |
| Citrate/Lactate | Viable sperm | 0.79 |
| Fumarate | Sperm with high mitochondrial potential | 0.80 |
| Total Motility | Total embryos | 0.80 |
| Citrate/Lactate | Progressive Motility | 0.80 |
| Citrate | Morulae | 0.81 |
| Citrate | Progressive Motility | 0.81 |
| Total Motility | Morulae and total blastocyst | 0.83 |
| Sperm with normal morphology | Morulae and total blastocyst | 0.83 |
| Citrate | Total Motility | 0.84 |
| Viable sperm | Developmental ratio | 0.85 |
| Progressive Motility | Morulae and total blastocyst | 0.86 |
| Citrate/Lactate | Morulae and total blastocyst | 0.86 |
| Citrate | Total embryos | 0.92 |

Unfolded pair-wise similarity matrix was obtained from the two correlated latent components from the projection to latent structures method (see Supplementary Table 2).

**Supplementary Figure 1.** Gating strategy for viability (**A**), acrosome integrity (**B**), mitochondrial potential (**C**) and calcium levels (**D**).


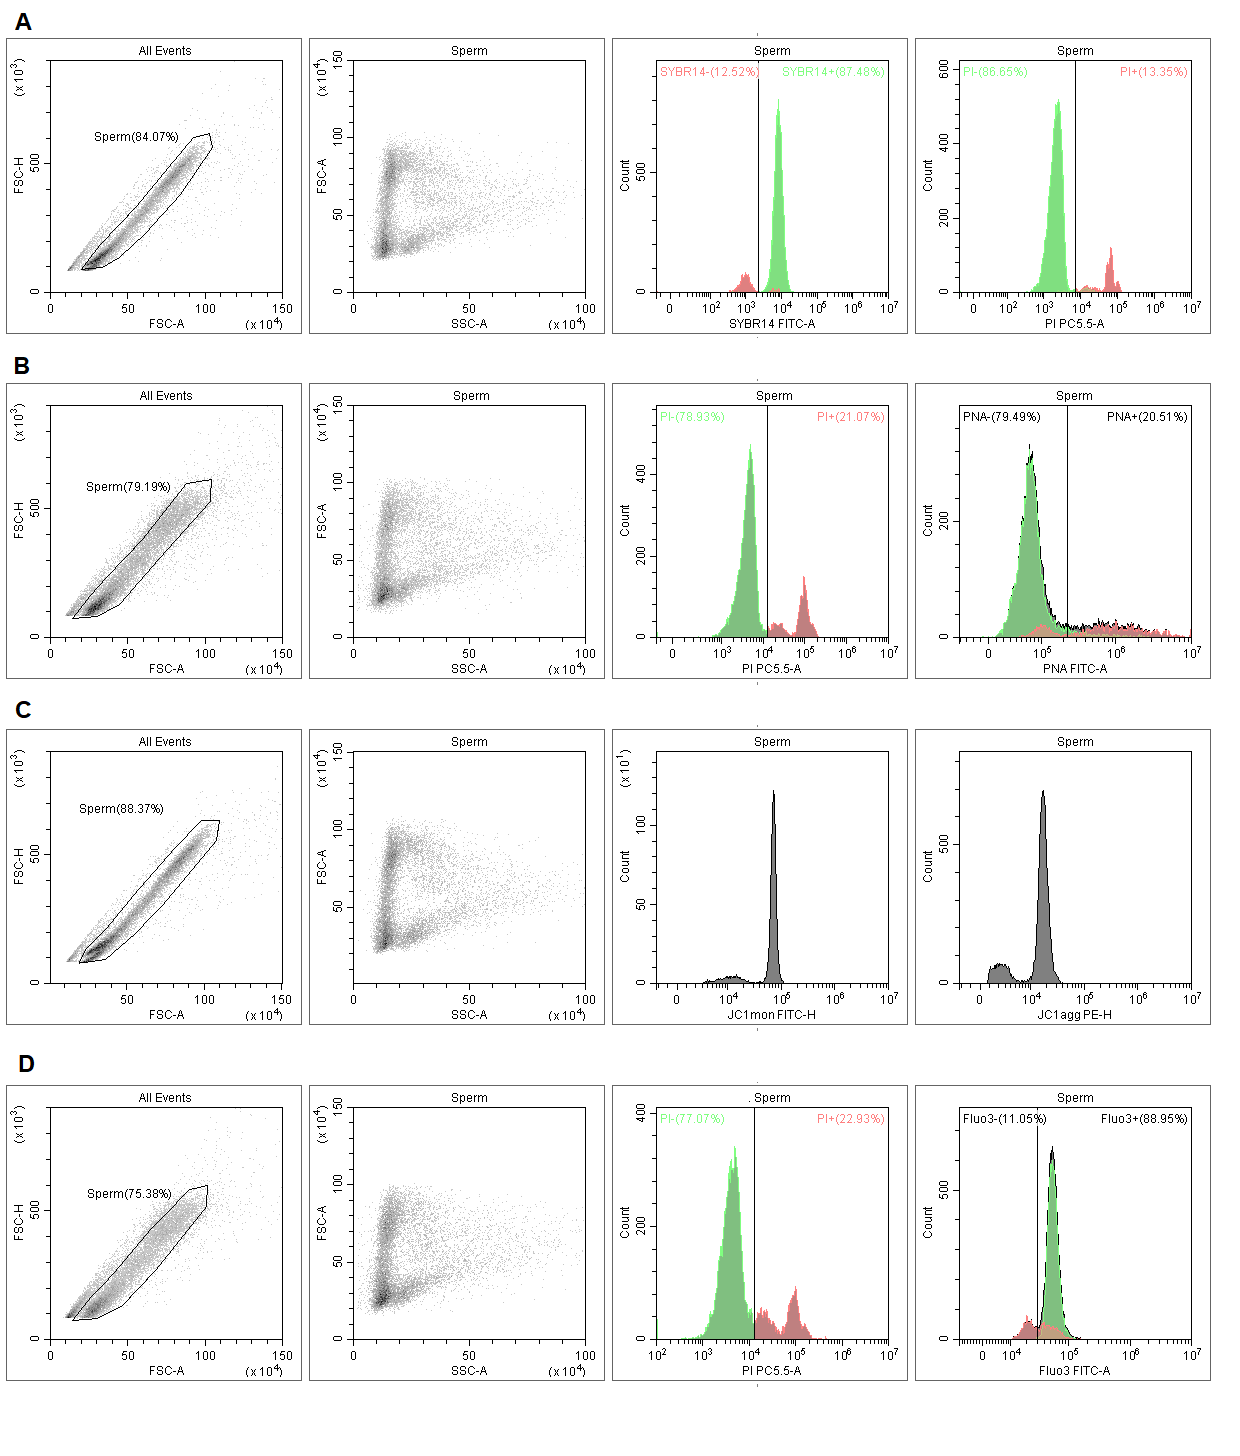

Supplement: Supplementary file 1 [file 6ee02a7676c464820fbbbba4.docx]
